# Supplementary material for: Simultaneous fMRI and tDCS for Enhancing Training of Flight Tasks
Source: MDPI journal article supplement (doi:10.3390/brainsci13071024), 2023-07-03
Supplement: s1 [file s1]

# Supplementary Information

## Simultaneous fMRI and tDCS for Enhancing Training of Flight Tasks

Jesse A. Mark <sup>1,\*</sup>, Hasan Ayaz <sup>1,2,3,4,5,6,\*</sup> and Daniel E. Callan <sup>7,\*</sup>

<sup>1</sup> School of Biomedical Engineering, Science and Health Systems, Drexel University, Philadelphia, PA 19104, USA

<sup>2</sup> Department of Psychological and Brain Sciences, College of Arts and Sciences, Drexel University, Philadelphia, PA 19104, USA

<sup>3</sup> Drexel Solutions Institute, Drexel University, Philadelphia, PA 19104, USA

<sup>4</sup> A.J. Drexel Autism Institute, Drexel University, Philadelphia, PA 19104, USA

<sup>5</sup> Department of Family and Community Health, University of Pennsylvania, Philadelphia, PA 19104, USA

<sup>6</sup> Center for Injury Research and Prevention, Children's Hospital of Philadelphia, Philadelphia, PA 19104, USA

<sup>7</sup> Brain Information Communication Research Laboratory, Advanced Telecommunications Research Institute International, Kyoto 619-0237, Japan

\* Correspondence: jam673@drexel.edu (J.A.M.); ayaz@drexel.edu (H.A.); dcallan@atr.jp (D.E.C.)

**Table S1.** Landing rate LMM significance results for all main effects, interactions, and covariates, as well as significant post-hoc comparisons (\* $p < 0.05$ , \*\* $p < 0.01$ , \*\*\* $p < 0.001$ ).

| Term                                         | Factor                                     | F-ratio |         | p-value     | Partial<br>η <sup>2</sup> |
|----------------------------------------------|--------------------------------------------|---------|---------|-------------|---------------------------|
| Landing Rate Main Effects (Post-Pre)         |                                            |         |         |             |                           |
|                                              | tDCS                                       | 0.9     | 1/19.1  | 0.354536    | 0.045                     |
|                                              | Experience                                 | 5.08    | 1/20.8  | 0.035108*   | 0.196                     |
|                                              | Experience*tDCS                            | 1.952   | 1/19.5  | 0.178011    | 0.091                     |
|                                              | Runway                                     | 5.739   | 1/542.4 | 0.016928*   | 0.010                     |
|                                              | Wind                                       | 1.766   | 1/541.3 | 0.184404    | 0.003                     |
|                                              | Auditory                                   | 5.494   | 1/536.1 | 0.019447*   | 0.010                     |
|                                              | Pre-training Performance                   | 186.6   | 1/501.2 | 0.000000*** | 0.271                     |
| Landing Rate Post-Hoc Comparisons (Post-Pre) |                                            |         |         |             |                           |
|                                              | Active stim, experience novice vs advanced | 6.012   | 1/21.1  | 0.045982*   | 0.222                     |
| Landing Rate Main Effects (Training)         |                                            |         |         |             |                           |
|                                              | tDCS                                       | 4.147   | 1/19.2  | 0.055735    | 0.178                     |
|                                              | Experience                                 | 10.49   | 1/21.4  | 0.003854*** | 0.329                     |
|                                              | Experience*tDCS                            | 4.401   | 1/19.7  | 0.049001*   | 0.183                     |
|                                              | Runway                                     | 18.85   | 1/547   | 0.000017*** | 0.033                     |

|                                                                    |       |          |             |       |
|--------------------------------------------------------------------|-------|----------|-------------|-------|
| Wind                                                               | 2.378 | 1/545.4  | 0.123645    | 0.004 |
| Auditory                                                           | 1.497 | 1/539.1  | 0.221749    | 0.003 |
| Pre-training Performance                                           | 135.8 | 1/447.3  | 0.000000*** | 0.233 |
| <b>Landing Rate Post-Hoc Comparisons (Training)</b>                |       |          |             |       |
| Active stim, experience novice vs advanced                         | 12.76 | 1/21.8   | 0.003443*** | 0.369 |
| Experience novice, active stim vs sham                             | 7.553 | 1/19.9   | 0.024894*   | 0.275 |
| <b>Landing Rate Main Effects (Training &amp; Post-Pre)</b>         |       |          |             |       |
| Run                                                                | 1.906 | 1/1102.4 | 0.167747    | 0.002 |
| tDCS                                                               | 2.294 | 1/19.5   | 0.145927    | 0.105 |
| Experience                                                         | 8.318 | 1/20.6   | 0.008989*** | 0.288 |
| Run*tDCS                                                           | 1.757 | 1/1102.4 | 0.185331    | 0.002 |
| Experience*tDCS                                                    | 3.278 | 1/19.7   | 0.085468**  | 0.143 |
| Runway                                                             | 24.07 | 1/1110.4 | 0.000001*** | 0.021 |
| Wind                                                               | 3.62  | 1/1108.9 | 0.057362    | 0.003 |
| Auditory                                                           | 6.154 | 1/1102.5 | 0.013259*   | 0.006 |
| Pre-training Performance                                           | 322   | 1/1018.3 | 0.000000*** | 0.240 |
| <b>Landing Rate Post-Hoc Comparisons (Training &amp; Post-Pre)</b> |       |          |             |       |
| Active stim, experience novice vs advanced                         | 10.02 | 1/20.8   | 0.009402*** | 0.325 |
